# Supplementary material
Source: publisher figshare collection journal article supplement (https://asha.figshare.com/articles/dataset/_/26882422)
Supplement: Supplementary file 1 [file 1]

## Supplemental Material S2. Participant exploratory outcome data.

| Alex: Treatment effect beginning session 15     |    |    |    |    |    |    |    |
|-------------------------------------------------|----|----|----|----|----|----|----|
| Spoken Language Session Number                  | 1  | 5  | 8  | 12 | 16 | 21 | 24 |
| Spoken Language Total Score                     | 6  | 1  | 5  | 7  | 9  | 8  | 7  |
| Reading Comprehension Session Number            | 3  | 6  | 9  | 17 | 23 | 25 |    |
| Reading Comprehension Total Score               | 12 | 13 | 10 | 12 | 9  | 10 |    |
| Total Score for Literal Questions (Max = 6)     | 6  | 6  | 6  | 6  | 5  | 4  |    |
| Total Score for Inferential Questions (Max = 9) | 6  | 7  | 4  | 6  | 4  | 6  |    |
| David: Treatment effect beginning session 14    |    |    |    |    |    |    |    |
| Reading Comprehension Session Number            | 1  | 5  | 9  | 13 | 17 | 21 | 25 |
| Reading Comprehension Total Score               | 12 | 10 | 9  | 11 | 13 | 14 | 9  |
| Total Score for Literal Questions (Max = 6)     | 6  | 6  | 6  | 6  | 6  | 6  | 5  |
| Total Score for Inferential Questions (Max = 9) | 6  | 4  | 3  | 5  | 8  | 8  | 4  |
| Tiffany: Treatment effect beginning session 15  |    |    |    |    |    |    |    |
| Spoken Language Session Number                  | 1  | 4  | 8  | 15 | 16 | 21 | 24 |
| Spoken Language Total Score                     | 1  | 0  | 5  | 1  | 6  | 2  | 1  |
| Reading Comprehension Session Number            | 1  | 5  | 9  | 13 | 17 | 22 |    |
| Reading Comprehension Total Score               | 2  | 8  | 2  | 6  | 8  | 4  |    |
| Total Score for Literal Questions (Max = 6)     | 2  | 4  | 0  | 3  | 4  | 0  |    |
| Total Score for Inferential Questions (Max = 9) | 0  | 4  | 2  | 3  | 4  | 4  |    |
