# Supplementary material
Source: publisher figshare collection journal article supplement (https://asha.figshare.com/articles/dataset/_/26882422)
Supplement: Supplementary file 2 [file 1]

## Supplemental Material S1. Functional text samples.

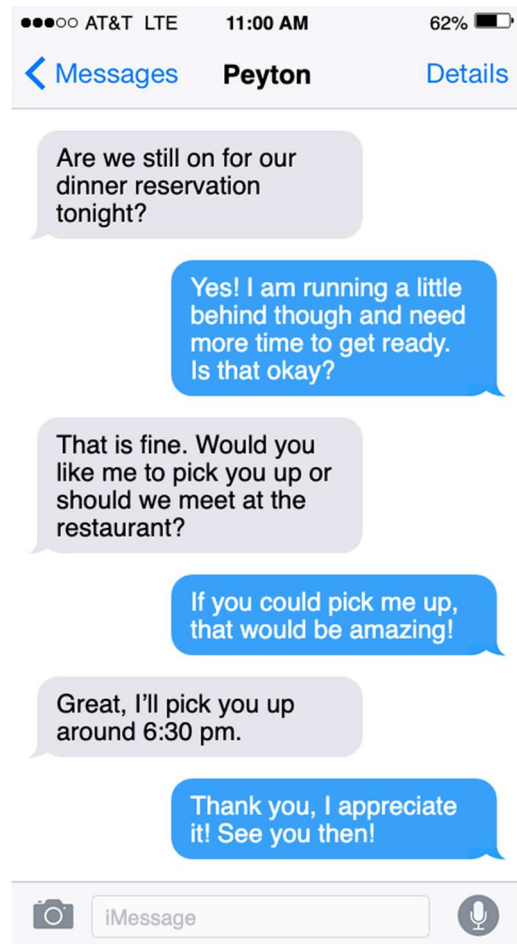

Text Message

### How to do a load of laundry:

1. Grab all of your dirty laundry.
2. Separate laundry into light and dark colors.
3. Place one pile of clothing into the washing machine
4. Add your favorite laundry detergent and fabric softener.
5. Pick the water temperature, cycle, and load size.
6. Start the washing machine.
7. Transfer the washed laundry to the dryer.
8. Select the drying temperature.
9. Remove the lint from the lint trap.
10. Start the dryer.
11. Once completed, fold and hang your laundry.

Written Directions

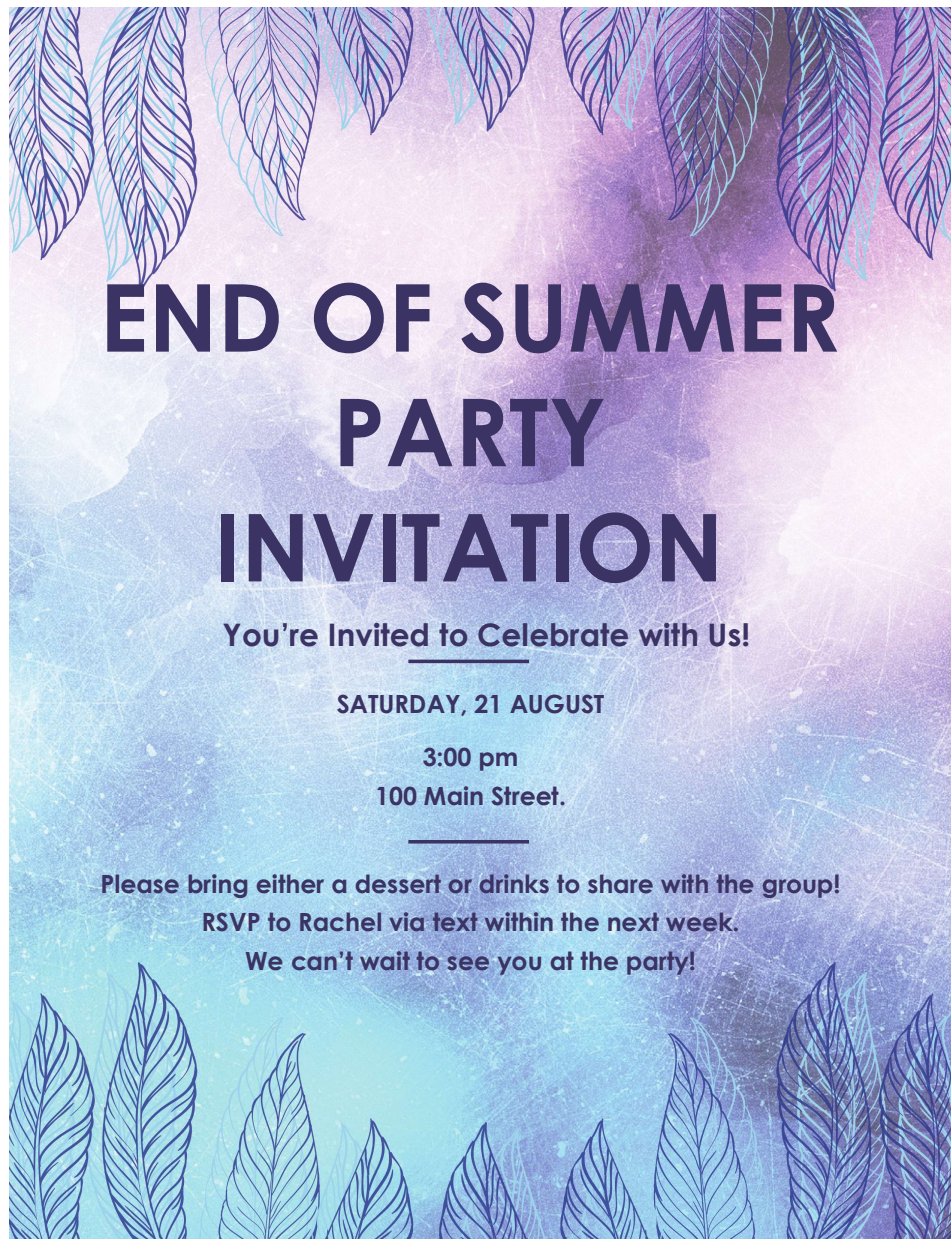

General Social

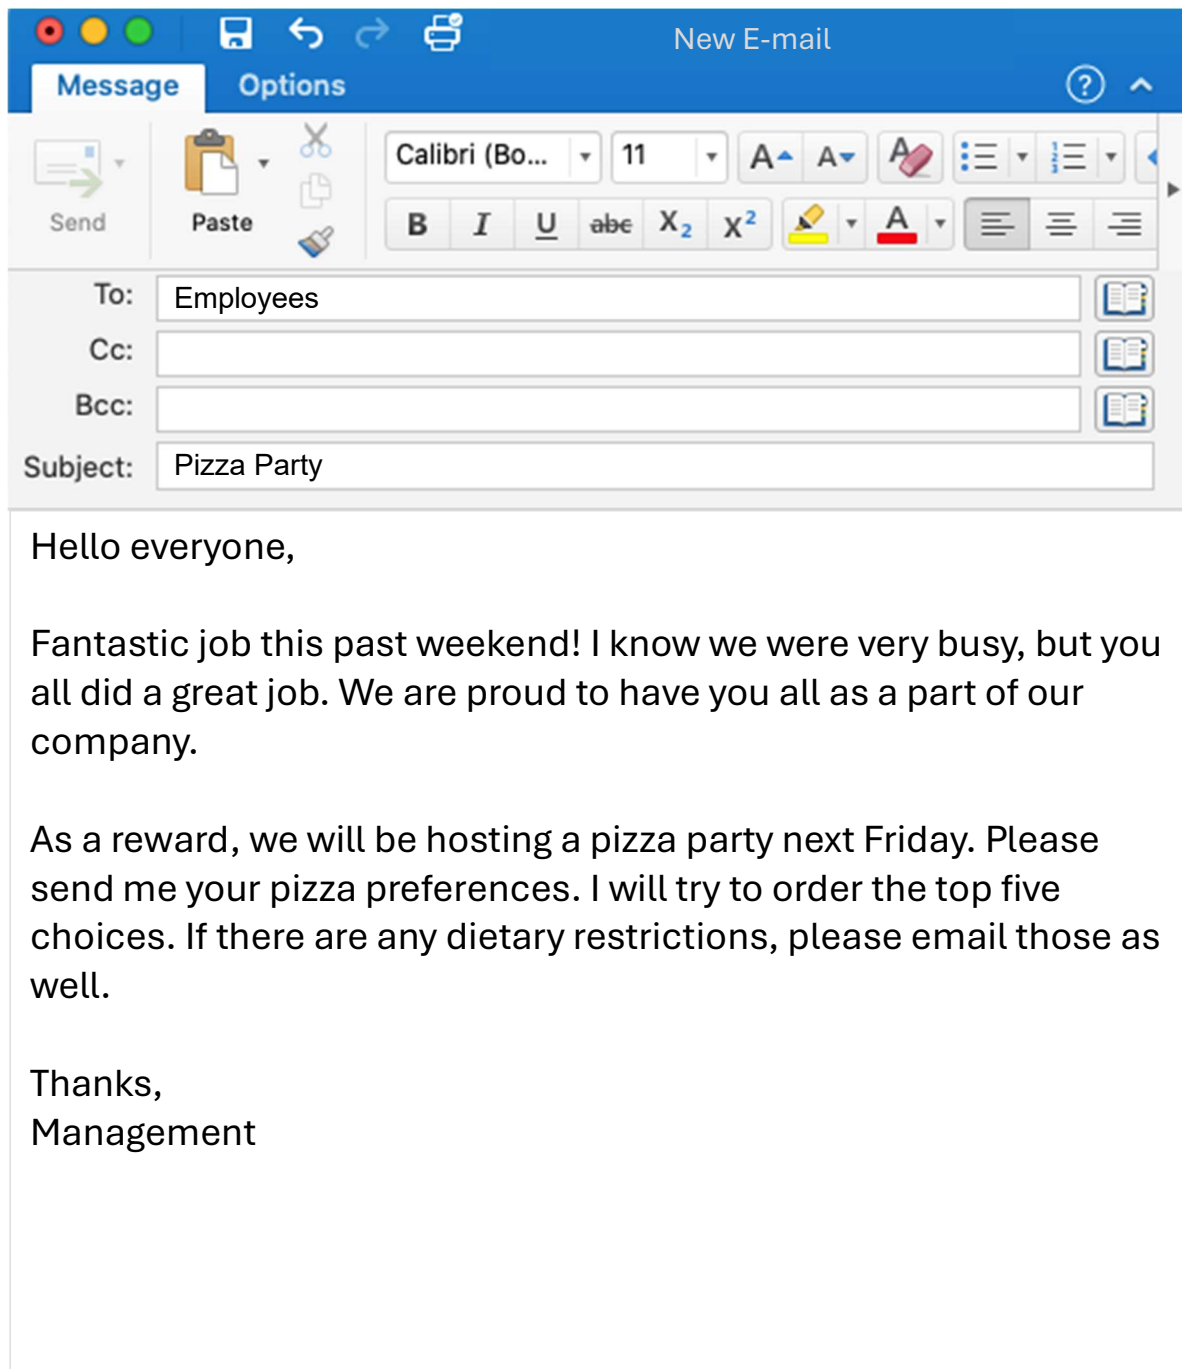

Employment Email

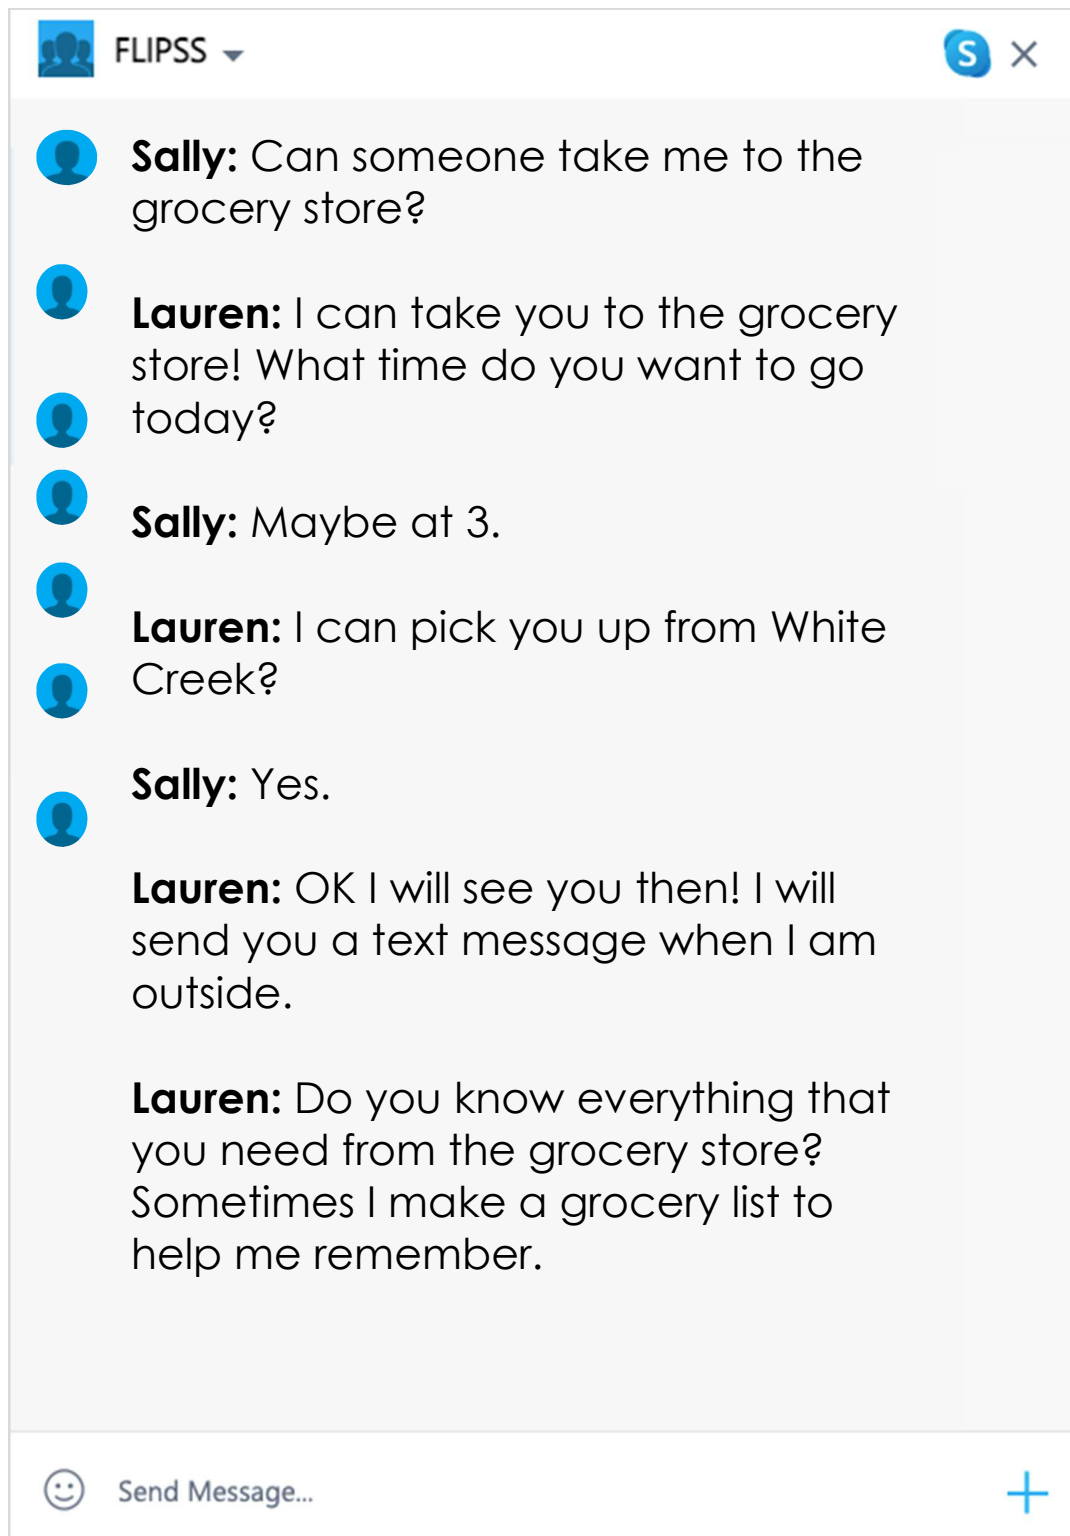

GroupMe Messages

## **Attention New Employees!**

Each new employee will have their own locker in the breakroom. Please read the following information about your locker:

- You will each be assigned your own locker.
- You are required to bring in your own lock. We are not responsible for what happens if you don't bring a lock.
- Please do not store any food items in your locker. The fridge in the breakroom is where you can store food if needed.

Thank you!

Vocational Stimuli
